14 **Abstract**

15 The basic reproduction number,  $R_0$ , determines the rate of spread of a communicable disease and  
16 therefore gives fundamental information needed to plan public health interventions. Estimated  $R_0$   
17 values are only useful, however, if they accurately predict the future potential rate of spread.

18 Using mortality records, we estimated the rate of spread of COVID-19 among 160 counties and  
19 county-aggregates in the USA. Most of the high among-county variance in the rate of spread was  
20 explained by four factors: the timing of the county-level outbreak (partial  $R^2 = 0.093$ ), population  
21 size (partial  $R^2 = 0.34$ ), population density (partial  $R^2 = 0.13$ ), and spatial location (partial  $R^2 =$   
22  $0.42$ ). Of these, the effect of timing is explained by early steps that people and governments took  
23 to reduce transmission, and population size is explained by the sample size of deaths that affects  
24 the statistical ability to estimate  $R_0$ . For predictions of future spread, population density is  
25 important, likely because it scales the average contact rate among people. To generate support  
26 for a possible explanation for the importance of spatial location, we show that SARS-CoV-2  
27 strains containing the G614 mutation to the spike gene are associated with higher rates of spread  
28 ( $P = 0.016$ ). The high predictability of  $R_0$  based on population density and spatial location  
29 allowed us to extend estimates to all 3109 counties in the lower 48 States. The high variation of  
30  $R_0$  among counties argues for public health policies that are enacted at the county level for  
31 controlling COVID-19.

32

33 **keywords:** covid-19, disease spread, epidemiology,  $R_0$

34

## 35 **Introduction**

36 The basic reproduction number,  $R_0$ , is the number of secondary infections produced per primary  
37 infection of a disease in a susceptible population, and it is a fundamental metric in epidemiology  
38 that gauges, among other factors, the initial rate of disease spread during an epidemic <sup>1</sup>. While  $R_0$   
39 depends in part on the biological properties of the pathogen, it also depends on properties of the  
40 host population such as the contact rate between individuals <sup>1,2</sup>. Estimates of  $R_0$  are required for  
41 designing public health interventions for infectious diseases such as COVID-19: for example,  $R_0$   
42 determines in large part the proportion of a population that must be vaccinated to control a  
43 disease <sup>3,4</sup>. Because  $R_0$  at the start of an epidemic measures the spread rate under "normal"  
44 conditions without interventions, these initial  $R_0$  values can inform policies to allow life to get  
45 "back to normal."

46 Using  $R_0$  estimates to design public health policies is predicated on the assumption that  
47 the  $R_0$  values at the start of the epidemic reflect properties of the infective agent and population,  
48 and therefore predict the potential rate of spread of the disease when interventions are  
49 implemented or in case of a resurgent outbreak. Estimates of  $R_0$ , however, might not predict  
50 future risks if (i) they are measured after public and private actions have been taken to reduce  
51 spread <sup>5,6</sup>, (ii) they are driven by stochastic events, such as super-spreading <sup>7,8</sup>, or (iii) they are  
52 driven by social or environmental conditions that are likely to change between the time of initial  
53 epidemic and the future time for which public health interventions are designed <sup>9,10</sup>. The only  
54 way to determine whether the initial  $R_0$  estimates reflect persistent properties of the respective  
55 populations is to identify those properties: if they are unlikely to change, then so too is  $R_0$   
56 unlikely to change.

57 Policies to manage for COVID-19 in the USA are set by a mix of jurisdictions from state  
58 to local levels. We estimated  $R_0$  at the county level both to match policymaking and to account  
59 for possibly large variation in  $R_0$  among counties. To estimate  $R_0$ , we performed the analyses on  
60 the number of daily COVID-19 deaths<sup>11</sup>. We used death count rather than infection case reports,  
61 because we suspected the proportion of deaths due to COVID-19 that were reported is less likely  
62 to change compared to reported cases. Due to the mathematical structure of our estimation  
63 procedure, unreported deaths due to COVID-19 will not affect our estimates of  $R_0$ , provided the  
64 proportion of unreported deaths does not change through time. We analyzed data for counties  
65 that had at least 100 reported cumulative deaths, and for other counties we aggregated data  
66 within the same state including deaths whose county was unknown. This led to 160 final time  
67 series representing counties in 39 states and the District of Columbia, of which 36 were  
68 aggregated at the state level. Some states, even after aggregating data from all counties, did not  
69 reach the 100 threshold of cumulative deaths, and therefore the spread rate for these states was  
70 not estimated.

71

## 72 **Results**

### 73 Estimates of the spread rate

74 Before estimating  $R_0$ , we first estimated the rate of spread of the COVID-19 as the rate of  
75 increase of the daily death counts,  $r_0$ . Although this approach is not typically used in  
76 epidemiological studies, it has the advantage of being statistically robust even when the data  
77 (death counts) are low and makes the minimum number of assumptions that could affect the  
78 estimates in unexpected ways (see SI: Overview of Statistical Methods). We applied a time-  
79 varying autoregressive state-space model to each time series of death counts<sup>12</sup>. In contrast to

80 other models of COVID-19 epidemics<sup>13,14</sup>, we do not incorporate the transmission process and  
81 the daily time course of transmission, but instead we estimate the time-varying exponential  
82 change in the number of deaths per day,  $r(t)$ . Detailed simulation analyses (SI: Simulation  
83 model) showed that estimates of  $r(t)$  generally lagged behind the true values. Therefore, we  
84 analyzed the time series in forward and reverse directions, and averaged to get the estimates of  $r_0$   
85 at the start of the time series (Fig. S1); this approach counterbalances the lag in the forward  
86 direction with the lag in the backwards direction, therefore reducing the lag effect. The model  
87 was fit accounting for greater uncertainty when mortality counts were low, and confidence  
88 intervals of the estimates were obtained from parametric bootstrapping, which is the most robust  
89 approach when counts are low. Thus, our strategy was to use a parsimonious model to give  
90 robust estimates of  $r_0$  even for counties that had experienced relatively few deaths, and then  
91 calculate  $R_0$  from  $r_0$  after the fitting process using well-established methods<sup>15</sup>.

92 Our  $r_0$  estimates ranged from close to zero for several counties to 0.33 for New York City  
93 (five boroughs); the latter implies that the number of deaths increases by a factor of  $e^{0.33} = 1.39$   
94 per day. There were highly statistically significant differences between upper and lower  
95 estimates (Fig. 1). Although our time series approach allowed us to estimate  $r_0$  at the start of  
96 even small epidemics, we anticipated two factors that could potentially affect our estimates of  $r_0$   
97 that are not likely to be useful in explaining future spread rates. The first factor is the timing of  
98 the onset of county-level epidemic: 35% of the local outbreaks started after the declaration of  
99 COVID-19 as a pandemic by the WHO on 11 March, 2020<sup>16</sup>, and thus we anticipated estimates  
100 of  $r_0$  to decrease with the Julian date of outbreak onset. Change in human behaviors caused by  
101 public awareness about COVID-19 at the outbreak onset will not necessarily predict future rates  
102 of spread. We used the second factor, the size of the population encompassed by the time series,

103 to factor out statistical bias from the time series analyses. Simulation studies showed that  
104 estimates for time series with low death counts were downward biased (Fig. S2). Because for a  
105 given spread rate  $r(t)$  the total number of deaths in a time series should be proportional to the  
106 population size, we used population size as a covariate to remove bias. In addition to these two  
107 factors that we do not think have strong predictive value for the future rate of spread, we also  
108 anticipated effects of population density and spatial autocorrelation. Therefore, we regressed  $r_0$   
109 against outbreak onset, population size and population density, and included spatially  
110 autocorrelated error terms.

111

### 112 Explaining variation in $r_0$

113 The regression analysis showed highly significant effects of all four factors (Table 1), and  
114 each factor had a substantial partial  $R^2_{\text{pred}}$ <sup>17</sup>. The overall  $R^2_{\text{pred}}$  was 0.69, so most of the county-  
115 to-county variance was explained. We calculated corrected  $r_0$  values, factoring out outbreak  
116 onset and population size, by standardizing the  $r_0$  values by 11 March, 2020 and the most  
117 populous county (for which the estimates of  $r_0$  are likely best). Counties with low to medium  
118 population density never had high corrected  $r_0$  values, suggesting that population density sets an  
119 upper limit on the rate of spread of COVID-19 (Fig. 2A), in agreement with expectations and  
120 published results<sup>1,18</sup>. Nonetheless, despite the unequivocal statistical effect of population density  
121 ( $P < 10^{-8}$ , Table 1), the explanatory power was not great (partial  $R^2_{\text{pred}} = 0.13$ ), probably because  
122 population density at the scale of counties will be only roughly related to contact rates among  
123 people.

124 Spatial autocorrelation, in turn, had strong power in explaining variation in  $r_0$  among  
125 counties (partial  $R^2_{\text{pred}} = 0.42$ , Table 1) and occurred at the scale of hundreds of kilometers (Fig.

126 2B). This spatial autocorrelation might reflect differences in public responses to COVID-19  
127 across the USA not captured by the variable in the regression model for outbreak onset. For  
128 example, Seattle, WA, reported the first positive case in the USA, on 15 January, 2020, and there  
129 was a public response before deaths were recorded <sup>19</sup>. In contrast, the response in New York City  
130 was delayed, even though the outbreak occurred later than in Seattle <sup>20</sup>. Spatial autocorrelation  
131 could also be caused by movement of infected individuals. However, movement would only lead  
132 to autocorrelation in our regression analysis if many of the reported deaths were of people  
133 infected outside the county. A further possibility is that spatial variation in the rate of spread of  
134 COVID-19 reflects spatial variation in the occurrence of different genetic strains of SARS-CoV-  
135 2.

136 To investigate whether spatial autocorrelation could potentially be caused by different  
137 strains of SARS-CoV-2 differing in infectivity, we analyzed publicly available information about  
138 genomic sequences from the GISAID metadata <sup>21</sup>. Scientific debate has focused on the role of  
139 the G614 mutation in the spike protein gene (D614G) to increase the rate of transmission of  
140 SARS-CoV-2 <sup>22</sup>. We therefore asked whether the proportion of strains containing the G614  
141 mutation was associated with higher rates of COVID-19 spread. Because the genomic samples  
142 are only located to the state level, we performed the analysis accordingly, for each state selecting  
143 the  $r_0$  from the county or county-aggregate with the highest number of deaths (and hence being  
144 most likely represented in the genomic samples). We further restricted genomic samples to those  
145 collected within 30 days following the outbreak onset we used to select the data for time-series  
146 analyses, and we required at least 5 genomic samples per state. This data handling resulted in 28  
147 states available for analysis. We again used our regression model, except that now we included  
148 the proportion of strains having the G614 mutation instead of spatial location (Eq. 7). The

149 proportion of samples containing the G614 mutation had a positive effect on  $r_0$  ( $P = 0.016$ , Table  
150 S2). The low proportion of strains containing the G614 mutation in the Pacific Northwest and the  
151 Southeast were associated with lower values of  $r_0$  (Fig. 3). Before analyzing the full GISAID  
152 data, we analyzed a subset from Nextstrain <sup>23</sup> naïvely, without engaging the specific hypothesis  
153 that the G614 mutation increased transmission. This naïve analysis picked up the same pattern ( $P$   
154 = 0.019, SI: Analysis of SARS-CoV-2 strains).

155 Higher transmissibility of strains containing the G614 mutation is also suggested by its  
156 increasing prevalence in strains in the USA <sup>24</sup>. Nonetheless, our analyses give no information  
157 about the mechanisms explaining differences in spread rates among strains. A consensus on the  
158 potential impact of SARS-CoV-2 mutations is still lacking <sup>22</sup>: some studies present evidence for  
159 a differential pathogenicity and transmissibility <sup>25,26</sup>, while others conclude that mutations might  
160 be mostly neutral or even reduce transmissibility <sup>27</sup>. Our analyses call for further investigation to  
161 better understand the potential link between viral genomic variation and its impact on  
162 transmission and mortality <sup>28</sup>.

163 To check whether there are other factors that might explain variation in our estimates of  
164  $r_0$  among counties, we investigated additional population characteristics <sup>29,30</sup> that might be  
165 expected to affect the initial spread rate of COVID-19: (i) median age, (ii) adult obesity, (iii)  
166 diabetes, (iv) education, (v) income, (vi) poverty, (vii) economic equality, (viii) race, and (ix)  
167 political leaning (Table S4). The first three characteristics likely affect morbidity <sup>31</sup>, although it is  
168 not clear whether higher morbidity will increase or decrease the spread rate. The remaining  
169 characteristics might affect health outcomes and responses to public health interventions; for  
170 example, education, income and poverty might all affect the need for individuals to work in jobs  
171 that expose them to greater risks of infection. Nonetheless, because we focused on the early



172 spread of COVID-19, we anticipated that these characteristics would have minimal effects.  
173 Despite the potential for all nine characteristics to affect estimates of  $r_0$ , we found that none was  
174 a statistically significant predictor of  $r_0$  when taking the four main factors into account (all  $P >$   
175 0.1). We also repeated all of the analyses on estimates of  $r(t)$  after COVID-19 was broadly  
176 established in the USA (5 May, 2020, assuming an average time between infection and death of  
177 18 days) (Table S5). The corresponding  $R^2_{\text{pred}} = 0.38$ , largely driven by a large positive effect of  
178 the date of outbreak onset. The absence of significant effects of the additional population  
179 characteristics on  $r_0$ , and the lower explanatory power of the model on  $r(t)$  at the end of the time  
180 series, underscore the importance of population density and spatial autocorrelation in predicting  
181 county-level values of  $r_0$ .

182

### 183 Extrapolating $R_0$ to all counties

184 In the regression model (Table 1), the standard deviation of the residuals was 1.11 times  
185 higher than the average standard error of the estimates of  $r_0$ . This implies that the uncertainty of  
186 an estimate of  $r_0$  from the regression is only slightly higher than the uncertainty in the estimate of  
187  $r_0$  from the time series itself; the regression model explains 81% ( $= 1/1.11^2$ ) of the explainable  
188 variance. Therefore, using estimates from death count time series from other counties will give  
189 estimates of  $r_0$  for a focal county (lacking reliable estimates) that are almost as precise as the  
190 estimate from the county's time series. In turn, this implies that the regression can also be used to  
191 extrapolate estimates of  $r_0$  to counties for which deaths were too sparse for time-series analysis.  
192 We used the regression to extrapolate values of  $R_0$ , derived from  $r_0$ , for all 3109 counties in the  
193 conterminous USA (Fig. 4, Table S1). The high predictability of  $r_0$ , and hence  $R_0$ , from the  
194 regression is seen in the comparison between  $R_0$  calculated from the raw estimates of  $r_0$  (Fig.

195 4A) and  $R_0$  calculated from the corrected  $r_0$  values (Fig. 4B). Extrapolation from the regression  
196 model makes it possible not only to get refined estimates for the counties that were aggregated in  
197 the time-series analyses; it also gives estimates for counties within states with so few deaths that  
198 county-aggregates could not be analyzed (Fig. 4C,D). The end product is a map of  $R_0$  for the  
199 conterminous USA (Fig. 4E).

200

## 201 **Discussion**

202 It is widely understood that different states and counties in the USA, and different  
203 countries in the world, have experienced COVID-19 epidemics differently. Our analyses have  
204 put numbers on these differences in the USA. The large differences argue for public health  
205 interventions to be designed at the county level. For example, the vaccination coverage in the  
206 most densely populated area, New York City, needed to prevent future outbreaks of COVID-19  
207 will be much greater than for sparsely populated counties. Therefore, once vaccines are  
208 developed, they should be distributed first to counties with high  $R_0$ . Similarly, if vaccines are not  
209 developed quickly and non-pharmaceutical public health interventions have to be re-instated  
210 during resurgent outbreaks, then counties with higher  $R_0$  values will require stronger  
211 interventions. As a final example, county-level  $R_0$  values can be used to assess the practicality of  
212 contact-tracing of infections, which become impractical when  $R_0$  is high <sup>32</sup>.

213 We present our county-level estimates of  $R_0$  as preliminary guides for policy planning,  
214 while recognizing the myriad other epidemiological factors (such as mobility <sup>33-35</sup>) and political  
215 factors (such as legal jurisdictions <sup>36</sup>) that must shape public health decisions <sup>3,37-39</sup>. Although we  
216 have emphasized the predictability of  $R_0$  among counties in the USA, values of  $R_0$  could change  
217 if there are changes in the transmissibility of strains that are present; our analyses suggest strain

218 differences (Fig. 3), and changes towards strains with higher transmissibility could lead to higher  
219  $R_0$  values. This argues for continued efforts to identify the transmissibility of different strains  
220 and where those strains are prevalent.

221 We recognize the importance of following the day-to-day changes in death and case rates,  
222 and short-term projections used to anticipate hospital needs and modify public policies <sup>40-42</sup>.  
223 Looking back to the initial spread rates, however, gives a window into the future and what public  
224 health policies will be needed when COVID-19 is endemic.

225

## 226 **Materials and Methods**

### 227 1. Data selection and handling

#### 228 *1.1 Death data*

229 For mortality due to COVID-19, we used time series provided by the New York Times <sup>11</sup>.  
230 We selected the New York Times dataset because it is rigorously curated. We analyzed  
231 separately only counties that had records of 100 or more deaths. The District of Columbia was  
232 treated as a county. Also, because the New York Times dataset aggregated the five boroughs of  
233 New York City, we treated them as a single county. For counties with fewer than 100 deaths, we  
234 aggregated mortality to the state level to create a single time series. For thirteen States (AK, DE,  
235 HI, ID, ME, MT, ND, NH, SD, UT, VM, WV, and WY), the aggregated time series did not  
236 contain 100 or more deaths and were therefore not analyzed.

237

#### 238 *1.2 County-level variables*

239 We obtained county-level population size and area (km<sup>2</sup>) from the US Census Bureau  
240 (21). Other socio-economic variables (Table S4) we obtained from Kirkegaard <sup>29</sup>. We selected  
241 socio-economic variables *a priori* in part to represent a broad set of population characteristics.

242

## 243 2. Time series analysis

### 244 *2.1 Time series model*

245 We used a time-varying autoregressive model <sup>12,43,44</sup> designed explicitly to estimate the  
246 rate of increase of a variable using non-Gaussian error terms. We assume in our analyses that the  
247 proportion of the population represented by a time series that is susceptible is close to one, and  
248 therefore there is no decrease in the infection rate caused by a pool of individuals who were  
249 infected, recovered, and were then immune to further infection.

250 The model is

251

$$252 \quad x(t) = r(t-1) + x(t-1) \quad (1a)$$

$$253 \quad r(t) = r(t-1) + \omega_r(t) \quad (1b)$$

$$254 \quad x^*(t) = x(t) + \phi(t) \quad (1c)$$

255

256 Here,  $x(t)$  is the unobserved, log-transformed value of daily deaths at time  $t$ , and  $x^*(t)$  is the  
257 observed count that depends on the observation uncertainty described by the random variable  
258  $\phi(t)$ . Because a few of the datasets that we analyzed had zeros, we replaced zeros with 0.5 before  
259 log-transformation. The model assumes that the death count increases exponentially at rate  $r(t)$ ,  
260 where the latent state variable  $r(t)$  changes through time as a random walk with  $\omega_r(t) \sim N(0, \sigma_r^2)$ .  
261 We assume that the count data follow a quasi-Poisson distribution. Thus, the expectation of

262 counts at time  $t$  is  $\exp(x(t))$ , and the variance is proportional to this expectation.

263 We fit the model using the Kalman filter to compute the maximum likelihood<sup>45,46</sup>. In  
264 addition to the parameters  $\sigma^2_r$ , and  $\sigma^2_\phi$ , we estimated the initial value of  $r(t)$  at the start of the  
265 time series,  $r_0$ , and the initial value of  $x(t)$ ,  $x_0$ . The estimation also requires an assumption for the  
266 variance in  $x_0$  and  $r_0$ , which we assumed were zero and  $\sigma^2_r$ , respectively. In the validation using  
267 simulated data, we found that the estimation process tended to absorb  $\sigma^2_r$  to zero too often. To  
268 eliminate this absorption to zero, we imposed a minimum of 0.02 on  $\sigma^2_r$ , which eliminated the  
269 problem in the simulations.

270

## 271 *2.2 Parametric bootstrapping*

272 To generate approximate confidence intervals for the time-varying estimates of  $r(t)$ , we  
273 used a parametric bootstrap designed to simulate datasets with the same characteristics as the real  
274 data that are then refit using the autoregressive model. We used bootstrapping to obtain  
275 confidence intervals, because an initial simulation study showed that standard methods, such as  
276 obtaining the variance of  $r(t)$  from the Kalman filter, were too conservative (the confidence  
277 intervals too narrow) when the number of counts was small. Furthermore, parametric  
278 bootstrapping can reveal bias and other features of a model, such as the lags we found during  
279 model fitting (Fig. S1A,B).

280 Changes in  $r(t)$  consist of unbiased day-to-day variation and the biased deviations that  
281 lead to longer-term changes in  $r(t)$ . The bootstrap treats the day-to-day variation as a random  
282 variable while preserving the biased deviations that generate longer-term changes in  $r(t)$ .  
283 Specifically, the bootstrap was performed by calculating the differences between successive

284 estimates of  $r(t)$ ,  $\Delta r(t) = r(t) - r(t-1)$ , and then standardizing to remove the bias,  $\Delta r_s(t) = \Delta r(t) -$   
285  $E[\Delta r(t)]$ . The sequence  $\Delta r_s(t)$  was fit using an autoregressive time-series model with time lag 1,  
286 AR(1), to preserve any shorter-term autocorrelation in the data. For the bootstrap a new time  
287 series was simulated from this AR(1) model,  $\Delta \rho(t)$ , and then standardized,  $\Delta \rho_s(t) = \Delta \rho(t) -$   
288  $E[\Delta \rho(t)]$ . The simulated time series for the spread rate was constructed as  $\rho(t) = r(t) + \Delta \rho_s(t)/$   
289  $2^{1/2}$ , where dividing by  $2^{1/2}$  accounts for the fact that  $\Delta \rho_s(t)$  was calculated from the difference  
290 between successive values of  $r(t)$ . A new time series of count data,  $\xi(t)$ , was then generated using  
291 equation (S1a) with the parameters from fitting the data. Finally, the statistical model was fit to  
292 the reconstructed  $\xi(t)$ . In this refitting, we fixed the variance in  $r(t)$ ,  $\sigma_r^2$ , to the same value as  
293 estimated from the data. Therefore, the bootstrap confidence intervals are conditional of the  
294 estimate of  $\sigma_r^2$ .

295

### 296 2.3. Calculating $R_0$

297 We derived estimates of  $R(t)$  directly from  $r(t)$  using the Dublin-Lotka equation <sup>15</sup> from  
298 demography. This equation is derived from a convolution of the distribution of births under the  
299 assumption of exponential population growth. In our case, the “birth” of COVID-19 is the  
300 secondary infection of susceptible hosts leading to death, and the assumption of exponential  
301 population growth is equivalent to assuming that the initial rate of spread of the disease is  
302 exponential, as is the case in equation 1. Thus,

303

$$304 \quad R(t) = 1/\sum_{\tau} e^{-r(t)\tau} p(\tau) \quad (2)$$

305

306 where  $p(\tau)$  is the distribution of the proportion of secondary infections caused by a primary  
307 infection that occurred  $\tau$  days previously. We used the distribution of  $p(\tau)$  from Li et al. <sup>47</sup> that  
308 had an average serial interval of  $T_0 = 7.5$  days; smaller or larger values of  $T_0$ , and greater or  
309 lesser variance in  $p(\tau)$ , will decrease or increase  $R(t)$  but will not change the pattern in  $R(t)$   
310 through time. Note that the uncertainty in the distribution of serial times for COVID-19 is a  
311 major reason why we focus on estimating  $r_0$ , rather than  $R_0$ : the estimates of  $r_0$  are not contingent  
312 on time distributions that are poorly known. Computing  $R(t)$  from  $r(t)$  does not depend on the  
313 mean or variance in time between secondary infection and death. We report values of  $R(t)$  at  
314 dates that are offset by 18 days, the average length of time between initial infection and death  
315 given by Zhou et al. <sup>48</sup>.

316

#### 317 *2.4. Initial date of the time series*

318 Many time series consisted of initial periods containing zeros that were uninformative.  
319 As the initial date for the time series, we chose the day on which the estimated daily death count  
320 exceeded 1. To estimate the daily death count, we fit a Generalized Additive Mixed Model  
321 (GAMM) to the death data while accounting for autocorrelation and greater measurement error  
322 at low counts using the R package `mgcv` <sup>49</sup>. We used this procedure, rather than using a threshold  
323 of the raw death count, because the raw death count will include variability due to sampling  
324 small numbers of deaths. Applying the GAMM to “smooth” over the variation in count data  
325 gives a well-justified method for standardizing the initial dates for each time series.

326

#### 327 *2.5. Validation*

328 We performed extensive simulations to validate the time-series analysis approach (SI

329 Appendix).

330

### 331 3. Regression analysis for $r_0$

332 We applied a Generalized Least Squares (GLS) regression model to explain the variation  
333 in estimates of  $r_0$  from the 160 county and county-aggregate time series:

334

$$335 \quad r_0 = b_0 + b_1 \textit{start.date} + b_2 \log(\textit{pop.size}) + b_3 \textit{pop.den}^{0.25} + \varepsilon \quad (3)$$

$$336 \quad \varepsilon = N(0, \sigma^2 \Sigma)$$

337

338 where *start.date* is the Julian date of the start of the time series,  $\log(\textit{pop.size})$  and  $\textit{pop.den}^{0.25}$  are  
339 the log-transformed population size and 0.25 power-transformed population density of the  
340 county or county-aggregate, respectively, and  $\varepsilon$  is a Gaussian random variable with covariance  
341 matrix  $\sigma^2 \Sigma$ . The transforms ( $\log(\textit{pop.size})$  and  $\textit{pop.den}^{0.25}$ ) were used to account for nonlinear  
342 relationships with  $r_0$  and were selected to give the highest maximum likelihood of the overall  
343 regression. The covariance matrix contains a spatial correlation matrix of the form  $\mathbf{C} = u\mathbf{I} + (1-$   
344  $u)\mathbf{S}(g)$  where  $u$  is the nugget and  $\mathbf{S}(g)$  contains elements  $\exp(-d_{ij}/g)$ , where  $d_{ij}$  is the distance  
345 between spatial locations and  $g$  is the range<sup>50</sup>. To incorporate differences in the precision of the  
346 estimates of  $r_0$  among time series, we weighted by the vector of their standard errors,  $\mathbf{s}$ , so that  $\Sigma$   
347  $= \text{diag}(\mathbf{s}) * \mathbf{C} * \text{diag}(\mathbf{s})$ , where  $*$  denotes matrix multiplication. With this weighting, the overall  
348 scaling term for the variance,  $\sigma^2$ , will equal 1 if the residual variance of the regression model  
349 matches the square of the standard errors of the estimates of  $r_0$  from the time series. We fit the  
350 regression model with the function `gls()` in the R package `nlme`<sup>51</sup>.

351 To make predictions for new values of  $r_0$ , we used the well-known relationship



352

$$353 \quad \hat{\varepsilon}_i = \bar{\varepsilon} + \mathbf{v}_i * \mathbf{V}^{-1}(\varepsilon_i - \bar{\varepsilon}) \quad (4)$$

354

355 where  $\varepsilon_i$  is the GLS residual for data  $i$ ,  $\hat{\varepsilon}_i$  is the predicted residual,  $\bar{\varepsilon}$  is the mean of the GLS  
356 residuals,  $\mathbf{V}$  is the covariance matrix for data other than  $i$ , and  $\mathbf{v}_i$  is a row vector row containing  
357 the covariances between data  $i$  and the other data in the dataset <sup>52</sup>. This equation was used for  
358 three purposes. First, we used it to compute  $R^2_{\text{pred}}$  for the regression model by removing each  
359 data point, recomputing  $\hat{\varepsilon}_i$ , and using these values to compute the predicted residual variance  
360 following <sup>17</sup>. Second, we used it to obtain predicted values of  $r_0$ , and subsequently  $R_0$ , for the 160  
361 counties and county-aggregates for which  $r_0$  was also from time series. Third, we used equation  
362 (4) similarly to obtain predicted values of  $r_0$ , and hence predicted  $R_0$ , for all other counties. We  
363 also calculated the variance of the estimates from <sup>52</sup>

364

$$365 \quad \hat{v}_i = \sigma^2 - \mathbf{v}_i * \mathbf{V}^{-1} * \mathbf{v}_i^t \quad (5)$$

366

367 Predicted values of  $R_0$  were mapped using the R package `usmap` <sup>53</sup>.

368

#### 369 4. Regression analysis for SARS-CoV-2 effects on $r_0$

370 The GISAID metadata <sup>21</sup> for SARS-CoV-2 contains the clade and state-level location for  
371 strains in the USA; strains G, GH, and GR contain the G614 mutation. For each state, we limited  
372 the SARS-CoV-2 genomes to those collected no more than 30 days following the onset of  
373 outbreak that we used as the starting point for the time series from which we estimated  $r_0$ ; from  
374 these genomes (totaling 5290 from all states), we calculated the proportion that had the G614

375 mutation. Only twenty-eight states had five or more genomes, so we limited the analyses to these  
376 states. For each state, we selected the estimates of  $r_0$  from the county or county-aggregate  
377 representing the greatest number of deaths. We fit these estimates of  $r_0$  with the weighted Least  
378 Squares (LS) model as in equation (3) with additional variables for strain.

379 Figure 3 was constructed using the R packages `usmap`<sup>53</sup> and `scatterpie`<sup>54</sup>.

380

381 **Acknowledgements:** We thank Steve R. Carpenter, Volker C. Radeloff, and Monica M. Turner

382 for comments on the manuscript. **Funding:** This work was supported by NASA-AIST-

383 80NSSC20K0282 (A.R.I). **Author contributions:** A.R.I and C.B. designed the study, and A.R.I.

384 led the analyses and writing of the manuscript. **Competing interests:** The authors declare no

385 competing interests. **Data and materials availability:** Data and R code for the analyses are

386 presented in the Supplementary Materials.

387

## 388 References

389 1 Delamater, P. L., Street, E. J., Leslie, T. F., Yang, Y. T. & Jacobsen, K. H. Complexity of  
390 the basic reproduction number ( $R_0$ ). *Emerging Infectious Diseases* **25**, 1-4 (2019).

391 2 Hilton, J. & Keeling, M. Estimation of country-level basic reproductive ratios for novel  
392 Coronavirus (COVID-19) using synthetic contact matrices. *Preprint* (2020).

393 3 Fine, P., Eames, K. & Heymann, D. L. “Herd immunity”: a rough guide. *Clinical*  
394 *Infectious Diseases* **52**, 911-916, doi:10.1093/cid/cir007 (2011).

395 4 Anderson, R. M. The concept of herd immunity and the design of community-based  
396 immunization programmes. *Vaccine* **10**, 928-935, doi:10.1016/0264-410X(92)90327-G  
397 (1992).

- 398 5 Flaxman, S. & et al. Estimating the number of infections and the impact of non-  
399 pharmaceutical interventions on COVID-19 in 11 European countries. *Report 13*,  
400 *Imperial College London* (2020).
- 401 6 Scire, J. *et al.* Reproductive number of the COVID-19 epidemic in Switzerland with a  
402 focus on the Cantons of Basel-Stadt and Basel-Landschaft. *Swiss Medical Weekly* **150**  
403 (2020).
- 404 7 Adam, D. & et al. Clustering and superspreading potential of severe acute respiratory  
405 syndrome coronavirus 2 (SARS-CoV-2) infections in Hong Kong. (2020).
- 406 8 Paull, S. H. *et al.* From superspreaders to disease hotspots: linking transmission across  
407 hosts and space. *Frontiers in Ecology and the Environment* **10**, 75-82,  
408 doi:10.1890/1101111 (2012).
- 409 9 Lofgren, E., Fefferman, N. H., Naumov, Y. N., Gorski, J. & Naumova, E. N. Influenza  
410 seasonality: underlying causes and modeling theories. *Journal of Virology* **81**, 5429-  
411 5436, doi:10.1128/JVI.01680-06 (2007).
- 412 10 Peña-García, V. H. & Christofferson, R. C. Correlation of the basic reproduction number  
413 ( $R_0$ ) and eco-environmental variables in Colombian municipalities with chikungunya  
414 outbreaks during 2014-2016. *PLoS Neglected Tropical Diseases* **13**, e0007878 (2019).
- 415 11 New York Times. Coronavirus (Covid-19) data in the United States. (2020).  
416 <https://github.com/nytimes/covid-19-data>.
- 417 12 Ives, A. R. & Dakos, V. Detecting dynamical changes in nonlinear time series using  
418 locally linear state-space models. *Ecosphere* **3**, art58, doi:[http://dx.doi.org/10.1890/ES11-](http://dx.doi.org/10.1890/ES11-00347.1)  
419 [00347.1](http://dx.doi.org/10.1890/ES11-00347.1) (2012).

- 420 13 Cori, A., Ferguson, N. M., Fraser, C. & Cauchemez, S. A New Framework and Software  
421 to Estimate Time-Varying Reproduction Numbers During Epidemics. *American Journal*  
422 *of Epidemiology* **178**, 1505-1512, doi:10.1093/aje/kwt133 (2013).
- 423 14 Flaxman, S. & al., e. Estimating the number of infections and the impact of non-  
424 pharmaceutical interventions on COVID-19 in 11 European countries. *Report 13*,  
425 *Imperial College London* (2020).
- 426 15 Dublin, L. I. & Lotka, A. J. On the true rate of natural increase. *Journal of the American*  
427 *Statistical Association* **20**, 305–339 (1925).
- 428 16 Cucinotta, D. & Vanelli, M. WHO declares COVID-19 a pandemic. *Acta Bio Medica*  
429 *Atenei Parmensis* **91**, 157-160, doi:10.23750/abm.v91i1.9397 (2020).
- 430 17 Ives, A. R. R<sub>2</sub>s for correlated data: phylogenetic models, LMMs, and GLMMs.  
431 *Systematic Biology* **68**, 234-251, doi:10.1093/sysbio/syy060 (2019).
- 432 18 Rader, B. *et al.* Crowding and the epidemic intensity of COVID-19 transmission.  
433 *medRxiv*, 2020.2004.2015.20064980, doi:10.1101/2020.04.15.20064980 (2020).
- 434 19 Fink, S. in *The New York Times* 1 (New York, NY, 2020).
- 435 20 Anon. in *The Economist* Vol. 435 4 (The Economist Newspaper Limited, London, UK,  
436 2020).
- 437 21 Elbe, S. & Buckland-Merrett, G. Data, disease and diplomacy: GISAID’s innovative  
438 contribution to global health. *Global Challenges* **1:33-46**, doi:10.1002/gch2.1018 (2017).
- 439 22 Grubaugh, N. D., Hanage, W. P. & Rasmussen, A. L. Making Sense of Mutation: What  
440 D614G Means for the COVID-19 Pandemic Remains Unclear. *Cell*,  
441 doi:<https://doi.org/10.1016/j.cell.2020.06.040> (2020).

- 442 23 Hadfield, J. *et al.* Nextstrain: real-time tracking of pathogen evolution. *Bioinformatics* **34**,  
443 4121-4123, doi:10.1093/bioinformatics/bty407 (2018).
- 444 24 NextstrainTeam. Nextstrain. (2020). <<https://nextstrain.org/ncov>>.
- 445 25 Korber, B. *et al.* Spike mutation pipeline reveals the emergence of a more transmissible  
446 form of SARS-CoV-2. *bioRxiv*, 2020.2004.2029.069054, doi:10.1101/2020.04.29.069054  
447 (2020).
- 448 26 Yao, H. *et al.* Patient-derived mutations impact pathogenicity of SARS-CoV-2. *medRxiv*,  
449 2020.2004.2014.20060160, doi:10.1101/2020.04.14.20060160 (2020).
- 450 27 Dorp, L. v. *et al.* No evidence for increased transmissibility from recurrent mutations in  
451 SARS-CoV-2. *bioRxiv*, 2020.2005.2021.108506, doi:10.1101/2020.05.21.108506 (2020).
- 452 28 Eaaswarkhanth, M., Al Madhoun, A. & Al-Mulla, F. Could the D614G substitution in the  
453 SARS-CoV-2 spike (S) protein be associated with higher COVID-19 mortality?  
454 *International Journal of Infectious Diseases* **96**, 459-460, doi:10.1016/j.ijid.2020.05.071  
455 (2020).
- 456 29 Kirkegaard, E. O. W. Inequality across US counties: an S factor analysis. *Open*  
457 *Quantitative Sociology and Political Science* (2016).
- 458 30 United States Census Bureau. USA Counties. (2011).  
459 <<https://www.census.gov/library/publications/2011/compendia/usa-counties-2011.html>>.
- 460 31 Centers for Disease Control and Prevention. Preliminary estimates of the prevalence of  
461 selected underlying health conditions among patients with coronavirus disease 2019 —  
462 United States, February 12–March 28, 2020. *MMWR. Morbidity and Mortality Weekly*  
463 *Report* **69** (2020). <[www.cdc.gov](http://www.cdc.gov)>.

- 464 32 Fraser, C., Riley, S., Anderson, R. M. & Ferguson, N. M. Factors that make an infectious  
465 disease outbreak controllable. *Proceedings for the National Academy of Sciences* **101**,  
466 6146–6151 (2004).
- 467 33 Bichara, D., Kang, Y., Castillo-Chavez, C., Horan, R. & Perrings, C. SIS and SIR  
468 Epidemic Models Under Virtual Dispersal. *Bulletin of Mathematical Biology* **77**, 2004-  
469 2034, doi:10.1007/s11538-015-0113-5 (2015).
- 470 34 Roberts, M. G. & Heesterbeek, J. a. P. A new method for estimating the effort required to  
471 control an infectious disease. *Proceedings of the Royal Society of London. Series B:*  
472 *Biological Sciences* **270**, 1359-1364, doi:10.1098/rspb.2003.2339 (2003).
- 473 35 Gatto, M. *et al.* Spread and dynamics of the COVID-19 epidemic in Italy: Effects of  
474 emergency containment measures. *Proceedings of the National Academy of Sciences* **117**,  
475 10484-10491, doi:10.1073/pnas.2004978117 (2020).
- 476 36 Gorman, S. & Bernstein, S. Wisconsin Supreme Court invalidates state's COVID-19 stay-  
477 at-home order. *Reuters* (2020). <[https://www.reuters.com/article/us-health-coronavirus-  
478 usa-wisconsin/wisconsin-supreme-court-invalidates-states-covid-19-stay-at-home-order-  
479 idUSKBN22Q04H](https://www.reuters.com/article/us-health-coronavirus-usa-wisconsin/wisconsin-supreme-court-invalidates-states-covid-19-stay-at-home-order-idUSKBN22Q04H)>.
- 480 37 Lahariya, C. Vaccine epidemiology: A review. *Journal of Family Medicine and Primary*  
481 *Care* **5**, 7-15, doi:10.4103/2249-4863.184616 (2016).
- 482 38 Mallory, M. L., Lindesmith, L. C. & Baric, R. S. Vaccination-induced herd immunity:  
483 Successes and challenges. *Journal of Allergy and Clinical Immunology* **142**, 64-66,  
484 doi:10.1016/j.jaci.2018.05.007 (2018).

- 485 39 Ridenhour, B., Kowalik, J. M. & Shay, D. K. Unraveling R0: Considerations for public  
486 health applications. *American Journal of Public Health* **104**, e32-e41,  
487 doi:10.2105/AJPH.2013.301704 (2013).
- 488 40 Imperial College London. Covid-19 Scenario Analysis Tool. (2020).  
489 <<https://covidsim.org>>.
- 490 41 Systrom, K. & Vladeck, T. Rt Covid-19. (2020). <<https://rt.live>>.
- 491 42 Swiss National Covid-19 Science Task Force. Situation report. (2020). <[https://ncs-  
tf.ch/en/situation-report](https://ncs-<br/>492 tf.ch/en/situation-report)>.
- 493 43 Zeng, Z., Nowierski, R. M., Taper, M. L., Dennis, B. & Kemp, W. P. Complex  
494 population dynamics in the real world: Modeling the influence of time-varying  
495 parameters and time lags. *Ecology* **79**, 2193-2209 (1998).
- 496 44 Bozzuto, C. & Ives, A. R. (2020).
- 497 45 Durbin, J. & Koopman, S. J. *Time Series Analysis by State Space Methods*. 2nd edn,  
498 (Oxford University Press, 2012).
- 499 46 Harvey, A. C. *Forecasting, structural time series models and the Kalman filter*.  
500 (Cambridge University Press, 1989).
- 501 47 Li, Q. *et al.* Early Transmission Dynamics in Wuhan, China, of Novel Coronavirus–  
502 Infected Pneumonia. *New England Journal of Medicine* **382**, 1199-1207,  
503 doi:10.1056/NEJMoa2001316 (2020).
- 504 48 Zhou, F. *et al.* Clinical course and risk factors for mortality of adult inpatients with  
505 COVID-19 in Wuhan, China: a retrospective cohort study. *The Lancet* **395**, 1054-1062,  
506 doi:10.1016/S0140-6736(20)30566-3 (2020).

507 49 Wood, S. N. *Generalized additive models: an introduction with R*. (CRC Press,  
508 Chapman and Hall, 2017).

509 50 Cressie, N. A. C. *Statistics for spatial data*. (John Wiley & Sons, 1991).

510 51 Pinheiro, J., Bates, D., DebRoy, S., Sarkar, D. & Team, R. C. nlme: Linear and nonlinear  
511 mixed effects models. R package version 3.1-147. (2020). <[https://CRAN.R-](https://CRAN.R-project.org/package=nlme)  
512 [project.org/package=nlme](https://CRAN.R-project.org/package=nlme)>.>.

513 52 Petersen, K. B. & Pedersen, M. S. (Technical University of Denmark, 2012).

514 53 Di Lorenzo, P. usmap: US Maps Including Alaska and Hawaii. R package version  
515 0.5.0.9999. (2020). < <https://usmap.dev>>.

516 54 Yu, G. scatterpie, R package version 0.1.4. (2019). <[https://CRAN.R-](https://CRAN.R-project.org/package=scatterpie)  
517 [project.org/package=scatterpie](https://CRAN.R-project.org/package=scatterpie)>.

518 55 Flaxman, S. & et al. State-level tracking of COVID-19 in the United States. *Report 23*,  
519 *Imperial College London* (2020).

520 56 Gelman, A. & Hill, J. *Data analysis using regression and multilevel/hierarchical models*.  
521 (Cambridge University Press, 2007).

522 57 Efron, B. & Tibshirani, R. J. *An introduction to the bootstrap*. (Chapman and Hall,  
523 1993).

524 58 Ferretti, L. *et al.* Quantifying SARS-CoV-2 transmission suggests epidemic control with  
525 digital contact tracing. *Science* **368**, eabb6936, doi:10.1126/science.abb6936 (2020).

526



527 **Table 1.** For 160 county and county-aggregates, results of the regression of the estimates of the  
 528 initial spread rate,  $r_0$ , against (i) the date of outbreak onset, (ii) total population size and (iii)  
 529 population density, in which (iv) spatial autocorrelation is incorporated into the residual error.  
 530 Transforms of population size and density were selected to best-fit the data and satisfy linearity  
 531 assumptions. The coefficient column contains the estimate of the regression parameters with  
 532 their associated t-tests; spatial autocorrelation is characterized by a range and nugget for regional  
 533 and local sources of variation, and their joint significance is given by a likelihood ratio test. For  
 534 the overall model,  $R^2_{\text{pred}} = 0.69$ , and the residual standard error is 1.11.  
 535

|                              | <b>Coefficient</b>            | <b>SE</b> | <b>t</b>        | <b>P</b>    | <b>partial <math>R^2_{\text{pred}}</math></b> |
|------------------------------|-------------------------------|-----------|-----------------|-------------|-----------------------------------------------|
| <b>onset</b>                 | -0.0018                       | 0.0004    | -4.28           | $10^{-4}$   | 0.093                                         |
| <b>log(size)</b>             | 0.0242                        | 0.0028    | 8.59            | $< 10^{-8}$ | 0.34                                          |
| <b>density<sup>1/4</sup></b> | 0.010                         | 0.0017    | 5.68            | $< 10^{-8}$ | 0.13                                          |
| <b>space</b>                 | range = 3.88<br>nugget = 0.39 |           | $\chi^2_2 = 59$ | $< 10^{-8}$ | 0.42                                          |

536

537

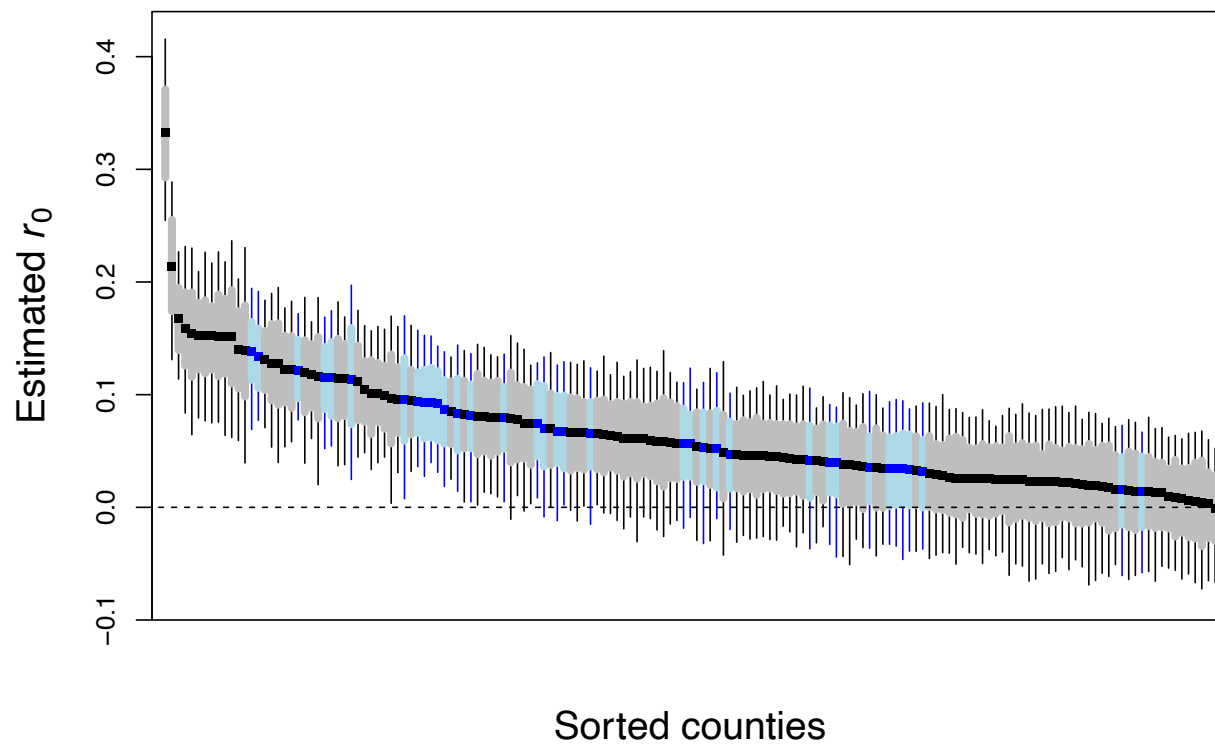

538

539 **Fig. 1.** Estimates of initial spread rate,  $r_0$ , for 124 counties (gray) and 36 county-aggregates  
540 (blue) with 66% (bars) and 95% (whiskers) bootstrapped confidence intervals.

541

542

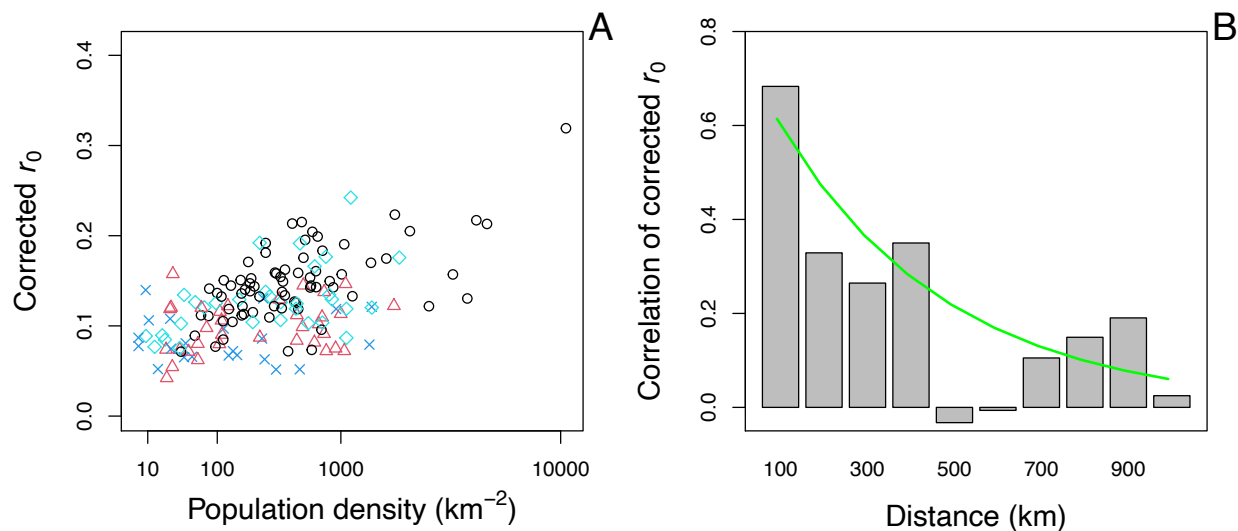

543

544

545 **Fig. 2.** Estimates of initial spread rates,  $r_0$ , after correcting for the effects of outbreak onset and

546 the population size. **(A)** Effect of population density: Northeast, black circles; Midwest, cyan

547 diamonds; South, blue x's; West, red triangles. **(B)** Effect of spatial proximity depicted by

548 computing correlations in bins representing 0-100 km, 100-200 km, etc. The line gives the

549 correlation of the residuals from the fitted regression.

550

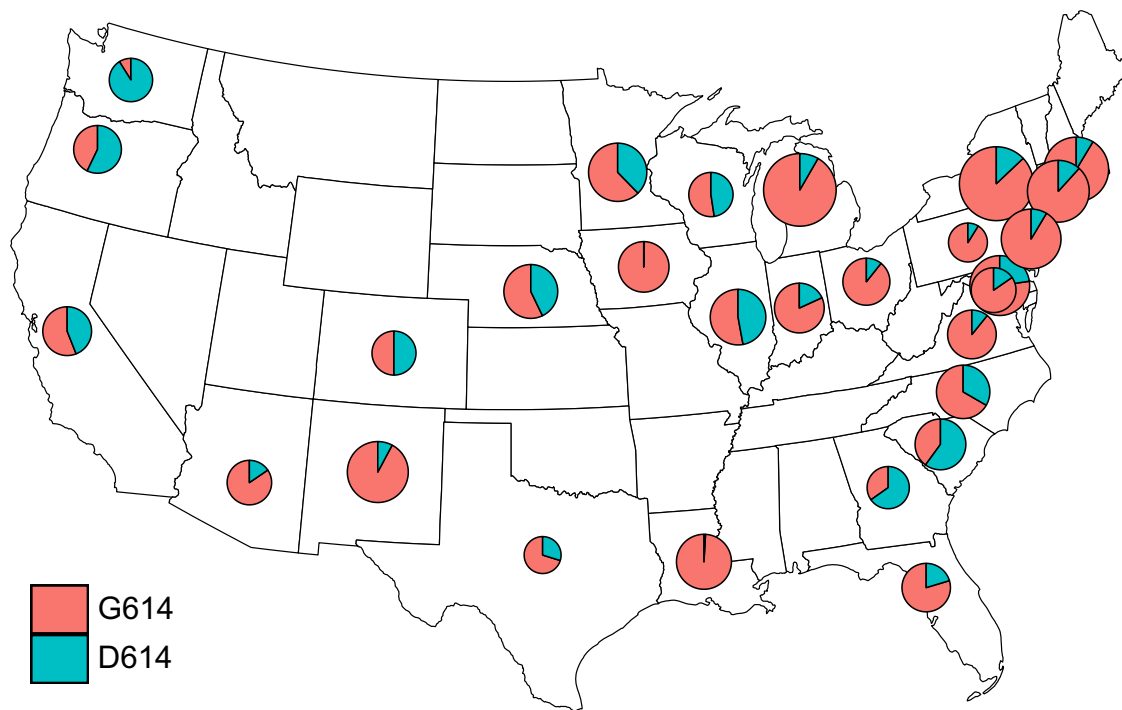

551  
552 **Fig. 3.** Spatial distribution of strains of SARS-CoV-2 having the G614 mutation in the spike  
553 gene at the outbreak onset among states. Pie charts give the proportion of samples in states  
554 collected within 30 days following the outbreak onset that are in the G clades (blue)<sup>21</sup>. The size  
555 of the pie is proportional to the residual values of  $r_0$  after removing the effects of the timing of  
556 outbreak onset, population size represented by the time series, and population density. For each  
557 state, we used the estimate of  $r_0$  corresponding to the county or county-aggregate that had the  
558 greatest number of deaths.  
559

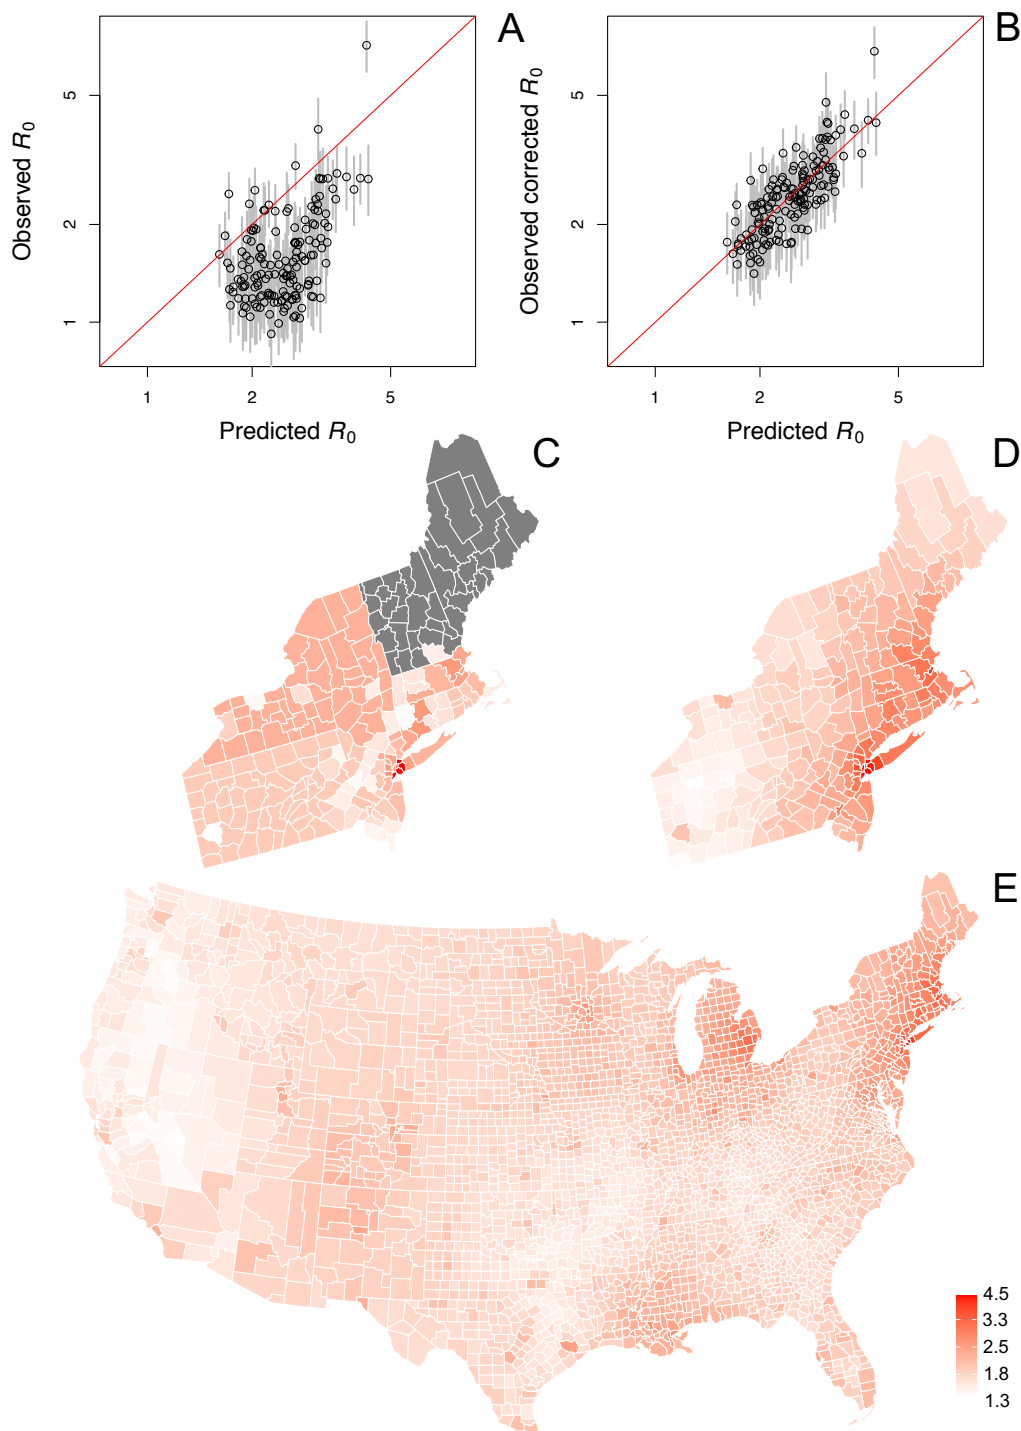

560

561 **Fig. 4.** (A,B) Raw and corrected estimates of  $R_0$  for 160 counties and county-aggregates. The

562 predicted  $R_0$  values are obtained from the regression model, with corrections to standardize

563 values to an outbreak onset of 11 March, 2020, and a population size equal to the most populous

564 county. Comparing the raw estimates of  $R_0$  (A) and the corrected  $R_0$  values (B) shows the  
565 predictive power of the regression analysis. We thus used the regression model to predict  $R_0$  for  
566 all counties. **(C,D)** To illustrate the prediction process for the northeastern states, the raw  
567 estimates (C) are all the same for county-aggregates and could not be made for some states  
568 (gray). In contrast, the predictability  $R_0$  in the regression model allows for better estimates (D).  
569 This makes it possible to extend estimates of  $R_0$  to all 3109 counties in the conterminous USA  
570 **(E)**.  
571

572

## Supplementary Information

573

574 **Estimating and explaining the spread of COVID-19 at the county level in the USA**

575

576 Anthony R. Ives<sup>1\*</sup>, Claudio Bozzuto<sup>2</sup>

577

578 Affiliations:

579 <sup>1\*</sup> Department of Integrative Biology, University of Wisconsin-Madison, Madison,

580 WI 53706, USA. [arives@wisc.edu](mailto:arives@wisc.edu). ORCHID

581 <sup>2</sup> Wildlife Analysis GmbH, Oetlisbergstrasse 38, 8053 Zurich, Switzerland.

582 [bozzuto@wildlifeanalysis.ch](mailto:bozzuto@wildlifeanalysis.ch). ORCHID

583

584 Corresponding Author: Anthony R. Ives, Department of Integrative Biology, University of

585 Wisconsin-Madison, Madison, WI 53706, USA. 608-238-3771. [arives@wisc.edu](mailto:arives@wisc.edu)

586

587

588 **The SI includes:**

589

590 Overview of Statistical Methods,

591 Simulation model,

592 Analysis of SARS-CoV-2 strains,

593 Figs. S1 to S5,

594 Tables S1 to S5

## 595 **Overview of Statistical Methods**

596           The rate of spread of a disease in a population at the early phase of an epidemic,  $r_0$ , when  
597 the entire population is susceptible depends on the basic reproduction number,  $R_0$ , giving the  
598 number of secondary infections produced per infected individual, and the distribution of the time  
599 between primary and secondary infections. Thus, if the spread rate and distribution of infection  
600 times can be estimated,  $R_0$  can then be calculated. Our strategy is to estimate  $r_0$  as the most direct  
601 parameter associated with the dynamics of an epidemic, and then subsequently estimate  $R_0$ . The  
602 advantages of calculating  $r_0$  include: (i) it captures all of the real-life complexities that affect  $R_0$   
603 by simply observing what happened in real life, and (ii) it uses data that are (tragically)  
604 becoming more prevalent. The challenges include (i) the changes in  $r(t)$  that are to be expected  
605 (and hoped for) as people and governments respond to lessen the spread, and (ii) the statistical  
606 challenges and uncertainties of determining rates of disease spread when the numbers of deaths  
607 are still low.

608           We developed and tested statistical methods to overcome the two challenges of  
609 estimating  $R_0$  from death data. Because the rate of spread of a disease may change rapidly in  
610 response to actions that are taken to reduce disease transmission, we used a time-varying  
611 autoregressive model that allows for the rate of spread to change through time,  $r(t)$ . Other models  
612 take a related approach <sup>6,55</sup>. The second challenge is that the counts of deaths at the beginning of  
613 an epidemic are low. To account for this, the time-series model includes increased uncertainty  
614 (measurement error) that depends on the time-varying estimate of the number of deaths. Standard  
615 (asymptotic) approaches often have poor statistical properties (type I errors, correctly calculated  
616 confidence intervals) when sample sizes are small <sup>56</sup>. Therefore, we use bootstrapping <sup>57</sup> in which  
617 simulation time series are reconstructed to share the same pattern as the observed time series; a



618 large number of simulated time series are then fit using the same statistical model as used to fit  
619 the original data. This bootstrapping procedure thus gives estimates and confidence intervals for  
620 model fit to the real data. Note that our approach is frequentist, in comparison to the majority of  
621 models that use a Bayesian framework.

622 Our approach focuses on estimating the time-varying rate of spread,  $r(t)$ , of the number of  
623 deaths. Our rationale is that, for statistical fitting, it is better to keep the model as simple as  
624 possible, rather than "building in" assumptions about the processes of infection, reporting, and  
625 death. Our simple phenomenological model uses the same data as more complicated, process-  
626 based models, and therefore both approaches ultimately rely on the same information. The  
627 simpler approach, however, does not depend on assumptions about the infection processes.

628 Instead, after estimating  $r_0$ , we computed  $R_0$  as  $1/\sum_{\tau} e^{-r(t)\tau} p(\tau)$ , where  $\tau$  is the number days after  
629 initial infection, and  $p(\tau)$  is the proportion of secondary infections produced per infected  
630 individual at  $\tau$ <sup>15</sup>. This expression assumes that deaths (removal of individuals from the  
631 population) occur after all secondary infections have occurred. We used the distribution of  $p(\tau)$   
632 that was estimated using contact tracing in Wuhan, China<sup>47</sup>.

633 To validate the statistical method, we constructed a simulation model of the transmission  
634 process and spread of infections iterated on a daily time scale. Our simulations considered  
635 scenarios in which the transmission rate changed through time either in steps or gradually to  
636 capture the extremes of possible changes in real  $R(t)$ . We varied the initial  $R_0$  and duration of  
637 simulations to produce epidemics that qualitatively match the county data we analyzed. Changes  
638 in our estimates of  $r(t)$  tended to lag behind changes in the true (simulated) value of  $r(t)$  (gray  
639 line and regions in Fig. S1A,B), and therefore we also estimated  $r(t)$  in the reverse direction  
640 (blue line and regions in Fig. S1A,B). For the estimate of the initial  $r_0$ , we averaged the estimates

641 from the forward and reverse time series. For the scenario of step changes in  $R(t)$  (Fig. S1 C), the  
642 estimates were unbiased and had accurate confidence intervals, although for the scenario of  
643 gradual changes (Fig. S1 D), there was some downwards bias. Nonetheless, the estimates of  
644 initial  $R_0$  captured the order of simulations according to the true  $R_0$ . In contrast, fitting the same  
645 time series with a commonly used Bayesian model that incorporates the transmission process  
646 given in the R package EpiEstim<sup>13</sup> gave estimates that poorly reflect the true (simulated) initial  
647  $R_0$  (Fig. S1 E,F).

648 We also used the simulation model to investigate the properties of the statistical method  
649 when the number of deaths was low, as occurred in some time series. Reducing the simulated  
650 values of  $R_0$  reveals that the estimates of  $r_0$  become biased downwards when the maximum  
651 number of reported deaths per day drops below 15 (Fig. S2). This is due to the time series  
652 containing too little information about the rate of increase in the number of mortalities for  
653 accurate estimates. Because we did not think that our method (or any other) could overcome this  
654 challenge, we incorporated population size encompassed by a time series in the subsequent  
655 regression analysis. We used population size rather than the maximum number of deaths,  
656 because this would introduce a confounding effect: time series with higher  $r_0$  will likely have  
657 higher numbers of deaths.

658 In order to extrapolate the estimates of  $R_0$  from 160 time series to the remaining counties  
659 in the conterminous USA, we *a priori* selected four predictors. We selected population size  
660 encompassed by the time series to account for possible downwards bias in sparse datasets. We  
661 selected the Julian date of the outbreak onset to factor out public and private responses to  
662 COVID-19. We included population density, because it could potentially affect transmission  
663 rates. Population size and density were weakly and negatively correlated among the 160 time

664 series (Pearson correlation between log population size and log density =  $-0.25$ ), and therefore  
665 there were no problems with multicollinearity. Finally, the regression model included spatial  
666 autocorrelation based on the latitude and longitude of the midpoint of the counties or county  
667 aggregates. Because the regression model had residual variance that was only slightly high than  
668 the variance of the estimates of  $r_0$  that the regression predicted, the precision of the estimates  
669 from the regression for the counties without time series will be on par with the precision of the  
670 counties with time series.

671

## 672 **Simulation model**

673 To assess the robustness of the statistical model, we built a simulation SIR (susceptible-  
674 infected-recovered) model of a hypothetical epidemic. The simulation model was not the same as  
675 the statistical model, so the goal was to determine whether the phenomenological statistical  
676 model was capable of capturing the rate of infection spread in the process-based simulations.

677 The simulation model tracks the number of infected individuals on day  $t$  who were  
678 infected  $\tau$  days previously,  $X(t; \tau)$ . After 25 days, they are all assumed to be recovered or dead.  
679 The probability distribution of the day on which a susceptible is infected,  $p(t)$ , is given by a  
680 Weibull distribution with mean 7.5 days and standard deviation 3.4 (23) (Fig. S3 A). For an  
681 individual who dies, the day of death,  $d(t)$ , is given by a Weibull distribution with mean 18.5  
682 days and standard deviation 3.4<sup>47</sup> (Fig. S3 B). Finally, for case data we need to know the time  
683 between initial infection and diagnosis,  $h(t)$ , which we assume is lognormally distributed with  
684 mean 5.5 days and standard deviation 2.2<sup>58</sup> (Fig. S3 C).

685 On day  $t$ , the number of new infections produced by individuals who were infected  $\tau$  days  
686 earlier is  $b(t) p(\tau)$ . The term  $b(t)$  is closely related to  $R(t)$ , the number of secondary infections

687 caused per infection. However, because we allow  $b(t)$  to fluctuate on a daily basis, here we use a  
688 notation that differs from  $R(t)$ . Note, however, that on average  $R(t) = \sum_{\tau} b(t + \tau) p(\tau)$ . The total  
689 number of new infections on day  $t$  is given by a lognormal Poisson distribution in which the  
690 mean of the Poisson process is  $b(t) \alpha(t) \sum_{\tau} p(\tau) X(t; \tau)$ , where the lognormal random variable  $\alpha(t)$   
691 is included to represent environmental variation.

692 Deaths occur according to a binomial distribution for each infection age category  $X(t; \tau)$ ,  
693 so that the probability of death of individuals that had been infected  $\tau$  days earlier is  $(1 - s) \beta(t)$   
694  $d(\tau)$ , where  $s$  is the overall survival probability and  $\beta(t)$  is a lognormal distribution. We assume  
695 that the overall survival probability for COVID-19 is 98%; changes in this assumption had little  
696 effect on the simulation study. Once an individual dies, they are removed from the pool of  
697 individuals.

698 To illustrate the simulations, we assumed that the expectation of the infection rate,  $b(t)$ ,  
699 changes as a step function (Fig. S4 A, black line), while there is also daily variation around this  
700 expectation (Fig. S4 A, points). We also calculated  $R(t)$  from the asymptotic rate of disease  
701 spread (Fig. S4 A, red line). This shows that the expected daily infection rate,  $b(t)$ , is closely  
702 related to the population-level  $R(t)$ . Over the simulated time series of 60 days, we then recorded  
703 the number of deaths (Fig. S4 B) and diagnosed cases (Fig. S4 C). We initiated the simulation  
704 with a single cohort of individuals, all infected on day 1 (Fig. S4 C, filled black dot). This gives  
705 the "worst-case" situation in which the distribution of time-since-infection is far from the stable  
706 age distribution.

707 We fit this simulated dataset using the same procedure as we used for the real data,  
708 including the same rules to determine which day to initiate the fitted time series (Fig. S1 A).

709 We performed a similar exercise while assuming that the expectation of the infection rate,  $b(t)$   
710 changes geometrically, producing a linear change in  $r(t)$  (Fig. S1 B). In this particular example,  
711 the estimated values of  $r(t)$  are below the true values in the simulation in the first part of the time  
712 series. Because there was a lag in response of the estimates of  $r(t)$  relative to  $b(t)$ , we fit the time  
713 series in both the forward and reversed directions, and we averaged these values (and their  
714 confidence intervals) for the final estimates. Note that this is possible in our approach, because  
715 we estimate  $r(t)$  rather than  $R(t)$ .

716 We performed 100 simulations with the expectation of  $b(t)$  changing as either a step  
717 function (Fig. S1 C) or geometrically (Fig. S1 D), to assess the overall robustness of the  
718 modeling approach. Simulations were performed by changing the initial value of  $b(t)$ . Because  
719 higher values of  $b(t)$  led to much higher numbers of deaths, we shorted the intervals between step  
720 changes and increased the decline in geometric changes in  $b(t)$  to roughly match the observed  
721 time series. Specifically, the simulated time series ranged in length from 55 to 150 days: for the  
722 case of step changes, the time series were broken into three equal periods, and for the case of  
723 geometric changes, the ending value of  $b(t)$  was kept the same. We also estimated  $R(t)$  using the  
724 R package EpiEstim under default control parameters<sup>13</sup>. EpiEstim has the same general structure  
725 of many of the Bayesian models that estimate  $R(t)$  directly using information about the  
726 transmission process (Fig. S1 E,F). Even though EpiEstim is structurally more complicated than  
727 our model, it tended to give values of  $R_0$  that were biased upwards when the true value was low,  
728 and biased downward when the true value was high. Finally, we investigated the bias in our  
729 estimates of  $r_0$  when the maximum number of deaths in a time series was low by simulating time  
730 series for 20 to 70 days, using an initial value of  $b(t)$  to correspond to  $R_0 = 4$ , and changing the  
731 timing of step changes or the rate of geometric decline of  $b(t)$  to correspond to the length of the

732 time series. The simulations show that the estimates of  $r_0$  are downward biased when the total  
733 numbers of counts are low (Fig. S2).

734

### 735 **Analysis of Nextstrain metadata of SARS-CoV-2 strains**

736 In the analyses presented in the main text, we used the GISAID metadata to test the  
737 specific assumption that the G614 mutation increases the rate of spread of SARS-CoV-2. Prior to  
738 this analysis, however, we analyzed a subset of the genomic data available from Nextstrain<sup>23</sup>.  
739 We present this analysis here, because it was a naïve analysis that did not have a specific  
740 hypothesis about what strains might lead to higher spread rates. Instead, we asked whether the  
741 proportion of different Nextstrain clades (19A, 19B, 20A, 20B, 20C in the USA) within a  
742 population were related to  $r_0$  estimates. We used the same statistical approach as we present for  
743 the GISAID metadata, except we included the proportion of strains from clades 19A, 19B, 20A,  
744 and 20B instead of the proportion in the G clades containing mutation G614; we excluded the  
745 largest clade, 20C, because the sums of the proportions must add to one, and therefore all of the  
746 information about the distribution of strain 20C among states is contained in the distribution of  
747 the other clades. We found that the proportion of samples within clade 19B had a negative effect  
748 on  $r_0$  ( $P = 0.019$ , Table S2). The high proportion of strains from 19B in the Pacific Northwest  
749 and the Southeast were associated with lower values of  $r_0$  (Fig. 3).

750

751

752 **Supplementary figures and tables**

753

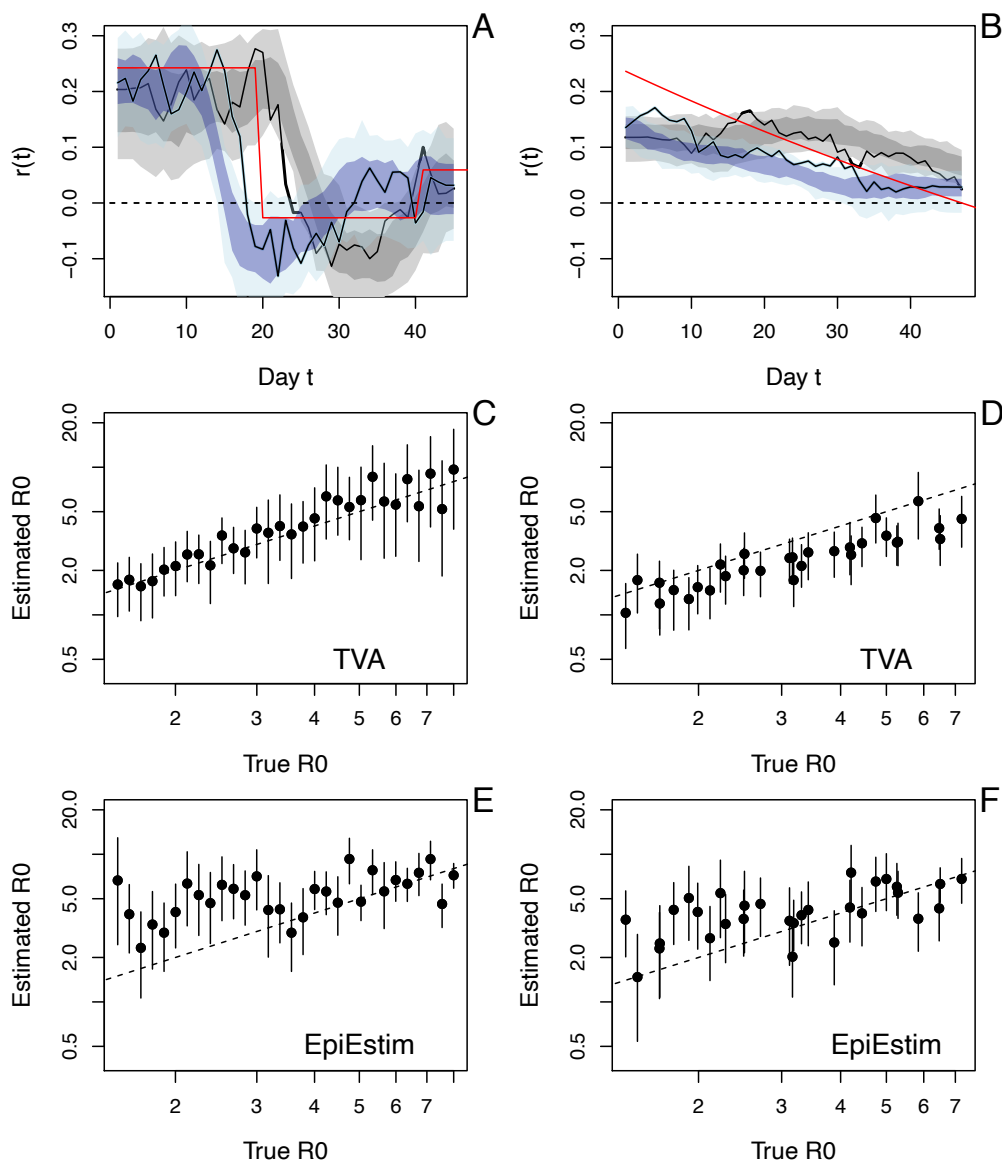

754

755 **Fig. S1.** Simulation study of fitting methods to epidemic death data. Simulations were fit with  
756 the time-varying autoregression model (TVA) in the forward (black line with dark and light gray  
757 regions giving 66% and 95% approximate confidence intervals) and reverse (blue line and  
758 regions) directions when the true value of  $R(t)$  (red line) shows either (A) a step or (B) gradual  
759 changes. For each simulation, the forward and reverse estimates were averaged to give an

760 estimate of  $R_0$  with 95% confidence intervals, which are plotted against the true values of  $R_0$  for  
761 step **(C)** and gradual **(D)** changes in  $R(t)$ . The same simulations with fit using EpiEstim **(E,F)**.  
762



763

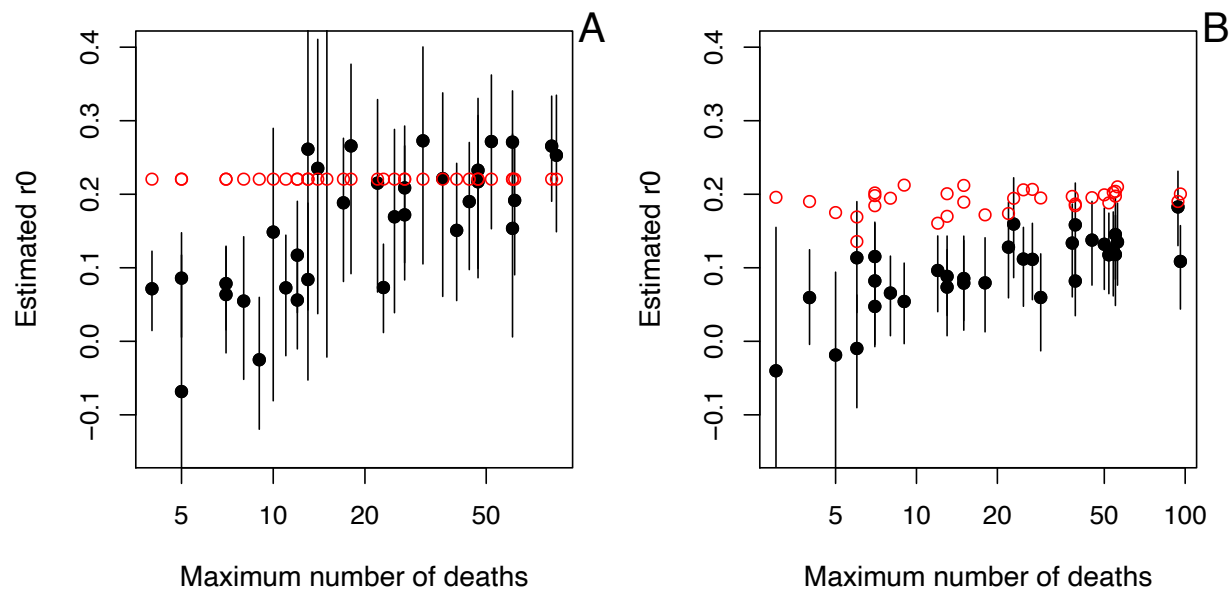

764

765

766 **Fig. S2.** Simulation study of the estimation of  $r_0$  from the forward and reverse time-varying  
767 autoregressive model for different population sizes. Simulations following those used for Fig. 1  
768 were performed assuming  $r(t)$  changed either (A) in steps or (B) gradually. The simulations were  
769 performed using the same initial value of  $r_0$ , but the length of time of the simulation was varied  
770 to change the maximum number of deaths that occurred. Due to the stochastic nature of the  
771 simulations, the realized value of  $r_0$  when the analysis was started differed among time series  
772 when  $r(t)$  changed gradually (red points in B), while they were all 0.22 when  $r(t)$  was changed in  
773 steps (A). The median in the maximum number of deaths among the real county time series was  
774 21.

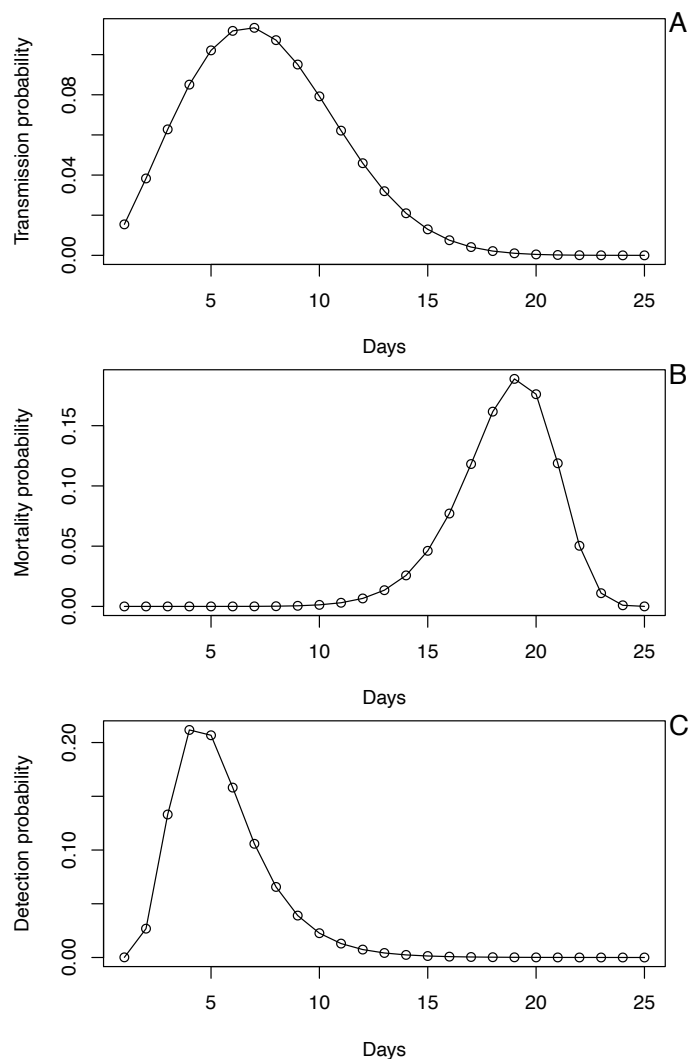

775

776

777 **Fig. S3.** Probability distributions used in the process-based SIR simulation model used to test

778 methods for robustness. **(A)** The probability distribution of the day on which a susceptible is

779 infected,  $p(t)$ , which is given by a Weibull distribution with mean 7.5 days and standard

780 deviation 3.4. **(B)** For an individual who dies, the day of death,  $d(t)$ , which is given by a Weibull

781 distribution with mean 18.5 days and standard deviation 3.4. **(C)** For case data, the time between

782 initial infection and diagnosis,  $h(t)$ , which is lognormally distributed with mean 5.5 days and

783 standard deviation 2.2.

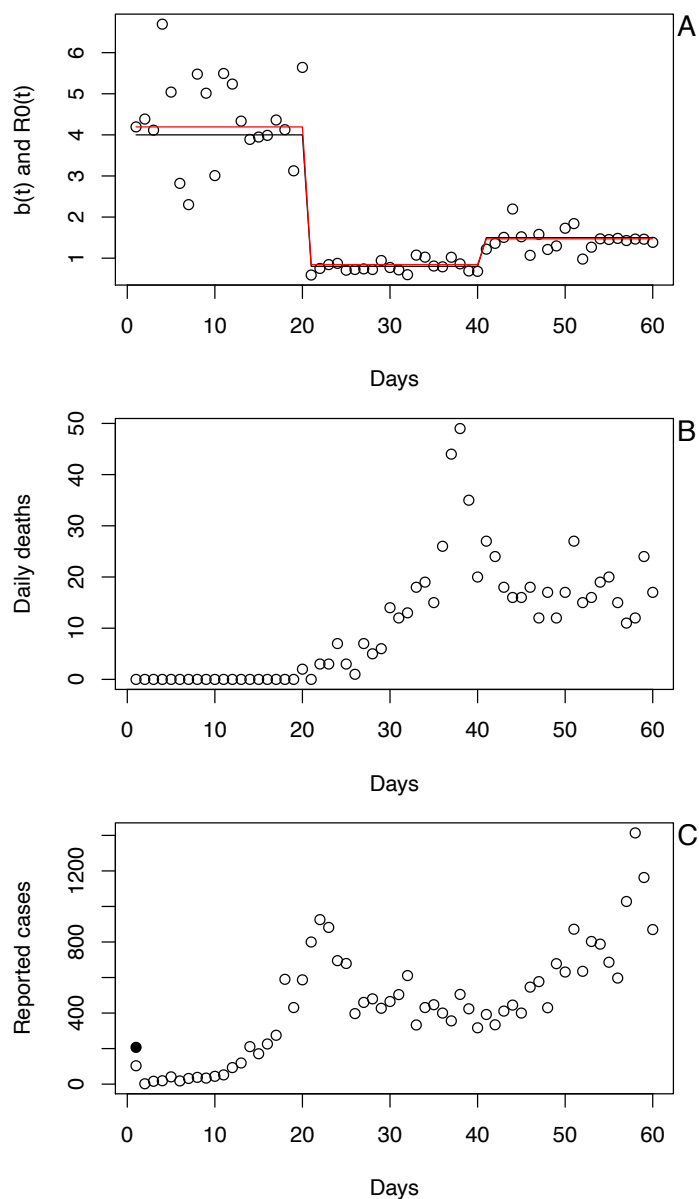

784

785 **Fig. S4.** Example simulation from the process-based SIR model. **(A)** Changes in the infection  
786 rate,  $b(t)$ , are modeled as a step function (black line) with daily variation (points).  $R_0(t)$  (red line)  
787 tracks changes in  $b(t)$ . **(B)** and **(C)** The number of deaths (B) and diagnosed cases (C) when the  
788 simulation is initiated with a single cohort of individuals, all infected on day 1 (solid black dot).

789

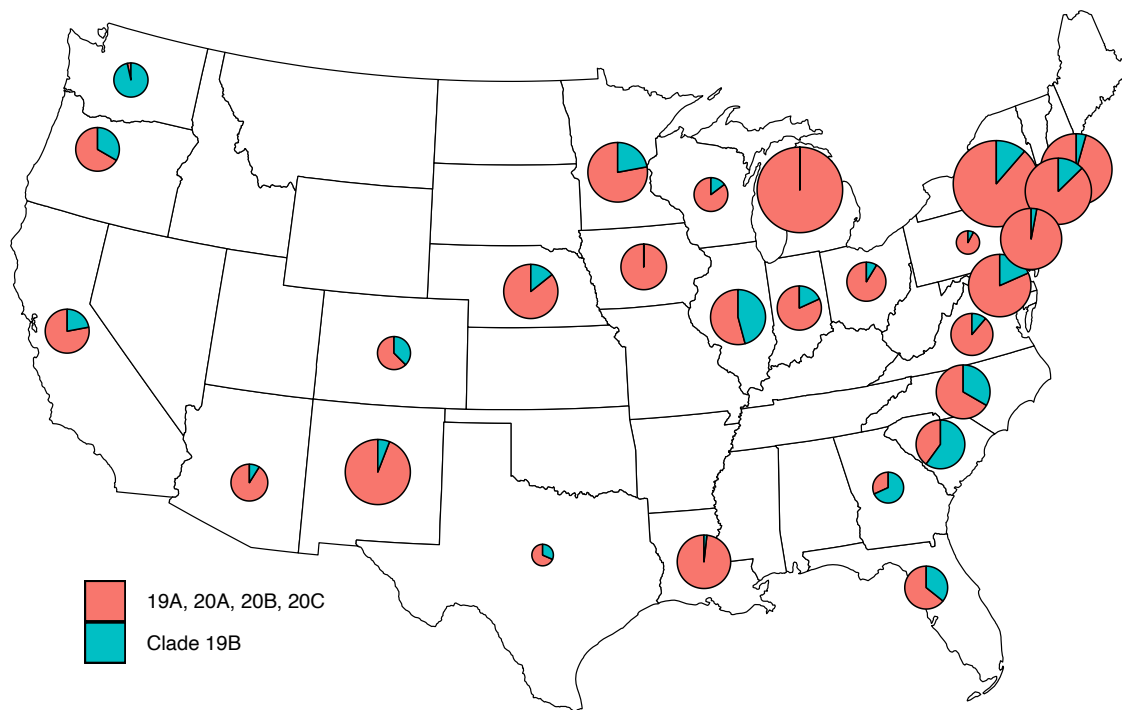

790

791 **Fig. S5.** Spatial distribution of the 19B clade of SARS-CoV-2 at the outbreak onset among  
792 states. Pie charts give the proportion of samples in states collected within 30 days following the  
793 outbreak onset that are in the 19B clade (blue). The size of the pie is proportional to the residual  
794 values of  $r_0$  after removing the effects of the timing of outbreak onset, population size  
795 represented by the time series, and population density. For each state, we used the estimate of  $r_0$   
796 corresponding to the county or county-aggregate that had the greatest number of deaths.

797

798

799 **Table S1.** Separate spreadsheet giving the following variables for the 3109 counties in the  
800 conterminous USA.  
801

| <b>Variable</b> | <b>Description</b>                                                      |
|-----------------|-------------------------------------------------------------------------|
| ST              | two-letter state abbreviation                                           |
| state_county    | state abbreviation with county name                                     |
| fips            | FIPS identifier for counties                                            |
| lon             | longitude                                                               |
| lat             | latitude                                                                |
| death.max       | maximum number of daily deaths                                          |
| start.date      | state date of the analyzed time series                                  |
| end.date        | end date of the analyzed time series                                    |
| den             | population density                                                      |
| r0.est          | estimate of $r_0$ from time-series analyses                             |
| r0.est.se       | standard error of the estimate of $r_0$ from bootstrapping              |
| r0.est.cor      | corrected estimate of $r_0$ removing start.date and the population size |
| r0.l66.cor      | lower 66% confidence interval of the corrected estimate of $r_0$        |
| r0.u66.cor      | upper 66% confidence interval of the corrected estimate of $r_0$        |
| r0.pred         | predicted estimate of $r_0$ from the regression model                   |
| r0.pred.se      | standard error of the predicted estimate of $r_0$                       |
| R0.pred         | predicted estimate of $R_0$ from the predicted estimate of $r_0$        |
| R0.pred.l66     | lower 66% confidence interval of the predicted estimate of $R_0$        |
| R0.pred.u66     | upper 66% confidence interval of the predicted estimate of $R_0$        |

802 **Table S2.** Regression of the initial spread rate,  $r_0$ , of COVID-19 against (i) the date of outbreak  
803 onset, (ii) total population size, (iii) population density, and (iv) the proportion of samples of  
804 SARS-CoV-2 containing the G614 mutation in the spike gene <sup>21</sup>. The estimates of  $r_0$  were for the  
805 county or county-aggregate with the greatest number of deaths in the state. All genetic samples  
806 were collected within 30 days following the onset of outbreak in a county. Twenty-eight states  
807 had five or more genetic samples, and only these states are included in the regression.  
808

|                              | <b>Coefficient</b> | <b>SE</b> | <b>t</b> | <b>P</b> |
|------------------------------|--------------------|-----------|----------|----------|
| <b>onset</b>                 | -0.0027            | 0.0013    | -2.23    | 0.036    |
| <b>log(size)</b>             | 0.022              | 0.009     | 2.46     | 0.022    |
| <b>density<sup>1/4</sup></b> | 0.013              | 0.005     | 2.85     | 0.009    |
| <b>G614</b>                  | 0.124              | 0.048     | 2.60     | 0.016    |

809

810 **Table S3.** Regression of the initial spread rate,  $r_0$ , of COVID-19 against (i) the date of outbreak  
811 onset, (ii) total population size, (iii) population density, and (iv) the proportion of samples of  
812 SARS-CoV-2 in four of the five clades identified in <sup>24</sup>. The estimates of  $r_0$  were for the county or  
813 county-aggregate with the greatest number of deaths in the state. All genetic samples were  
814 collected within 30 days following the onset of outbreak in a county. Twenty-seven states had  
815 five or more genetic samples, and only these states are included in the regression. Transforms of  
816 population size and density were selected to best-fit the data and satisfy linearity assumptions.  
817

|                              | <b>Coefficient</b> | <b>SE</b> | <b>t</b> | <b>P</b> |
|------------------------------|--------------------|-----------|----------|----------|
| <b>onset</b>                 | 0.0027             | 0.0014    | -1.88    | 0.076    |
| <b>log(size)</b>             | 0.023              | 0.010     | 2.18     | 0.042    |
| <b>density<sup>1/4</sup></b> | 0.015              | 0.005     | 3.00     | 0.007    |
| <b>19A</b>                   | -0.083             | 0.091     | -0.91    | 0.37     |
| <b>19B</b>                   | -0.134             | 0.052     | -02.54   | 0.019    |
| <b>20A</b>                   | -0.034             | 0.055     | -0.71    | 0.48     |
| <b>20B</b>                   | 0.008              | 0.165     | -0.05    | 0.96     |

818

819 **Table S4.** Variables giving population characteristics that were including in the regression model  
820 (equation S3). No variable was statistically significant. Data from <sup>29,30</sup>.

821

| <b>Variable</b>   | <b>Description</b>                                |
|-------------------|---------------------------------------------------|
| median age        | median age 2010                                   |
| adult obesity     | incidence of adult obesity                        |
| diabetes          | incidence of adult diabetes                       |
| education         | percent bachelor's degree or higher, 2005-2009    |
| income            | median earnings 2010                              |
| poverty           | percentage people below federal poverty threshold |
| economic equality | Gini index                                        |
| race              | percent White, non-Latino                         |
| political leaning | proportion of votes cast for Donald Trump, 2016   |

822

823



824 **Table S5.** For 160 county and county-aggregates, regression of spread rate at the end of the time  
 825 series, corresponding to 5 May, 2020,  $r(t_{end})$ , against (i) the date of outbreak onset, (ii) total  
 826 population size and (iii) population density, in which (iv) spatial autocorrelation is incorporated  
 827 into the residual error. Transforms of population size and density were selected to best-fit the  
 828 data and satisfy linearity assumptions. The coefficient column contains the estimate of the  
 829 regression parameters with their associated t-tests; spatial autocorrelation is characterized by a  
 830 range and nugget for regional and local sources of variation, and their joint significance is given  
 831 by a likelihood ratio test. For the overall model,  $R^2_{pred} = 0.38$ .  
 832

|                              | <b>Coefficient</b>            | <b>SE</b> | <b>t</b>          | <b>P</b>    | <b>partial <math>R^2_{pred}</math></b> |
|------------------------------|-------------------------------|-----------|-------------------|-------------|----------------------------------------|
| <b>onset</b>                 | 0.0021                        | 0.0003    | 6.40              | $< 10^{-8}$ | 0.17                                   |
| <b>log(size)</b>             | 0.0097                        | 0.0021    | 4.61              | $< 10^{-6}$ | 0.083                                  |
| <b>density<sup>1/4</sup></b> | -0.0008                       | 0.0013    | -0.57             | 0.57        | 0.003                                  |
| <b>space</b>                 | range = 0.29<br>nugget = 0.18 |           | $\chi^2_2 = 10.3$ | 0.0056      | 0.099                                  |

833
